# Supplementary material for: Effective flotation separation of apatite from dolomite using a new eco-friendly depressant gallic acid
Source: Royal Society of Chemistry journal article supplement (doi:10.1039/d3gc03325b), 2023-12-19
Supplement: d3gc03325b1.pdf [file d3gc03325b1.pdf]

## 1. The XPS high-resolution spectra of O 1s on apatite and dolomite

XPS high-resolution spectra of O 1s before and after GA treatment of apatite and dolomite.

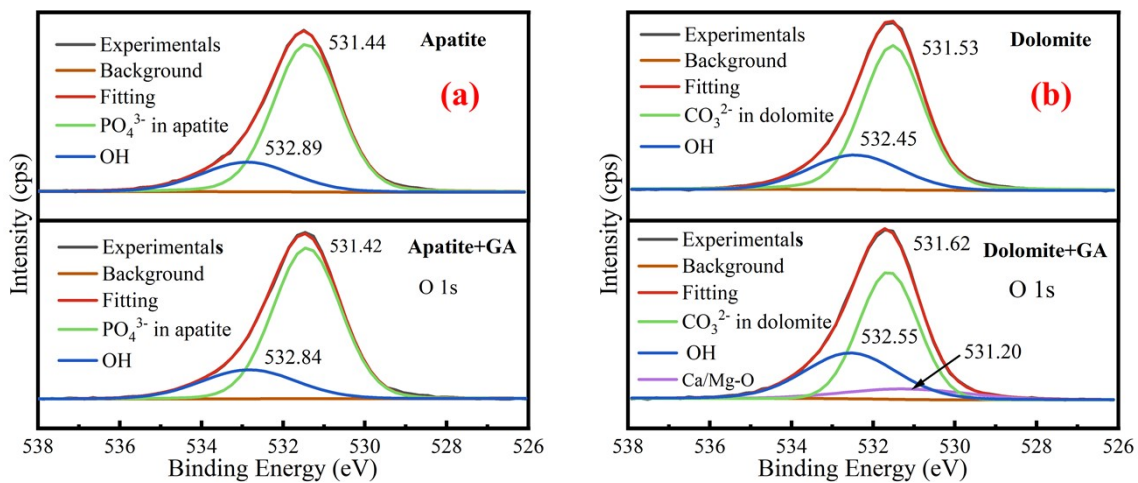

Fig. 1. XPS high-resolution spectra of O 1s on apatite (a) and dolomite (b).
